# Supplementary material for: The Effects of Chemical Bonding at Subatomic Resolution: A Case Study on α-Boron
Source: MDPI journal article supplement (doi:10.3390/molecules26144270), 2021-07-14
Supplement: s1 [file s1]

## **SUPPLEMENTARY MATERIALS**

### **The Effects of Chemical Bonding at Subatomic Resolution: A Case Study on $\alpha$ -boron**

*Andreas Fischer, Georg Eickerling and Wolfgang Scherer*

Table S1: Complete list of critical points of the topology of the electron density of  $\alpha$ -boron from refinements of experimental data of this study, the results from Mondal *et al.* (ref 45 in the manuscript) as well as the periodic DFT calculation. <sup>a</sup>  $x, y, z$  <sup>b</sup>  $-x+\frac{2}{3}, -x+y+\frac{1}{3}, -z+\frac{1}{3}$  <sup>c</sup>  $-x+y, -x, z$  <sup>d</sup>  $-x, -x+y, -z$  <sup>e</sup>  $y, x, -z$  <sup>f</sup>  $-x+y, -x+1, z$  <sup>g</sup>  $-y+1, x-y+1, z$  <sup>h</sup>  $-y, x-y, z$  <sup>i</sup>  $x-y, -y+1, -z$

| cp # | study                                           | rank   | $m$ | $\rho(r_c)$<br>(eÅ <sup>-3</sup> )            | $L(r_c)$<br>(eÅ <sup>-5</sup> )          | $\epsilon$                            | $\lambda_3$<br>(eÅ <sup>-5</sup> )    | location<br>description                                                               |
|------|-------------------------------------------------|--------|-----|-----------------------------------------------|------------------------------------------|---------------------------------------|---------------------------------------|---------------------------------------------------------------------------------------|
| 1    | -                                               | (3,-3) | 6   | -                                             | -                                        | -                                     | -                                     | B <sub>p</sub> <sup>a</sup>                                                           |
| 2    | -                                               | (3,-3) | 6   | -                                             | -                                        | -                                     | -                                     | B <sub>e</sub> <sup>a</sup>                                                           |
| 3    | HCM<br>EHCM(sph)<br>EHCM(asph)<br>Mondal<br>DFT | (3,-1) | 3   | 1.079<br>1.043<br>1.075<br>{1.104}<br>[1.080] | 9.40<br>8.84<br>9.06<br>{9.57}<br>[9.21] | 0.05<br>0.02<br>0.03<br>{-}<br>[0.00] | 0.69<br>0.76<br>1.18<br>{-}<br>[1.69] | B <sub>p</sub> <sup>a</sup> -B <sub>p</sub> <sup>b</sup> (exo)                        |
| 4    | HCM<br>EHCM(sph)<br>EHCM(asph)<br>Mondal<br>DFT | (3,-1) | 6   | 0.866<br>0.829<br>0.809<br>{0.820}<br>[0.823] | 3.12<br>2.90<br>2.84<br>{2.26}<br>[3.01] | 6.96<br>5.90<br>5.86<br>{-}<br>[4.03] | 1.09<br>1.09<br>1.00<br>{-}<br>[1.33] | B <sub>p</sub> <sup>a</sup> -B <sub>p</sub> <sup>c</sup> (endo)                       |
| 5    | HCM<br>EHCM(sph)<br>EHCM(asph)<br>Mondal<br>DFT | (3,-1) | 6   | 0.817<br>0.791<br>0.803<br>{0.804}<br>[0.796] | 3.02<br>2.88<br>3.06<br>{2.47}<br>[2.87] | 2.31<br>3.14<br>4.52<br>{-}<br>[2.70] | 1.32<br>1.12<br>0.98<br>{-}<br>[1.57] | B <sub>e</sub> <sup>a</sup> -B <sub>e</sub> <sup>d</sup> (endo)                       |
| 6    | HCM<br>EHCM(sph)<br>EHCM(asph)<br>Mondal<br>DFT | (3,-1) | 6   | 0.756<br>0.748<br>0.774<br>{0.764}<br>[0.768] | 2.58<br>2.55<br>2.81<br>{1.95}<br>[2.60] | 4.41<br>5.82<br>7.16<br>{-}<br>[3.45] | 1.01<br>1.02<br>0.85<br>{-}<br>[1.45] | B <sub>p</sub> <sup>a</sup> -B <sub>e</sub> <sup>e</sup> (endo)                       |
| 7    | HCM<br>EHCM(sph)<br>EHCM(asph)<br>Mondal<br>DFT | (3,-1) | 12  | 0.756<br>0.743<br>0.774<br>{0.745}<br>[0.764] | 1.93<br>1.94<br>2.60<br>{1.39}<br>[2.39] | 3.93<br>5.46<br>8.78<br>{-}<br>[3.93] | 1.44<br>1.29<br>0.77<br>{-}<br>[1.50] | B <sub>p</sub> <sup>a</sup> -B <sub>e</sub> <sup>a</sup> (endo)                       |
| 8    | HCM<br>EHCM(sph)<br>EHCM(asph)<br>Mondal<br>DFT | (3,-1) | 6   | 0.545<br>0.541<br>0.554<br>{0.561}<br>[0.541] | 1.65<br>1.50<br>1.62<br>{1.24}<br>[1.43] | 5.11<br>4.36<br>9.72<br>{-}<br>[3.58] | 1.07<br>1.03<br>0.47<br>{-}<br>[1.18] | B <sub>e</sub> <sup>a</sup> -B <sub>e</sub> <sup>f</sup> (exo)                        |
| 9    | HCM<br>EHCM(sph)<br>EHCM(asph)<br>Mondal<br>DFT | (3,+1) | 2   | 0.863<br>0.823<br>0.800<br>{0.795}<br>[0.807] | 2.76<br>2.40<br>2.20<br>{1.15}<br>[2.15] | -                                     | -                                     | B <sub>p</sub> <sup>a</sup> -B <sub>p</sub> <sup>c</sup> -B <sub>p</sub> <sup>h</sup> |
| 10   | HCM<br>EHCM(sph)<br>EHCM(asph)<br>Mondal        | (3,+1) | 6   | 0.731<br>0.722<br>0.759<br>{0.704}            | 0.67<br>0.94<br>1.76<br>[1.96]           | -                                     | -                                     | B <sub>p</sub> <sup>a</sup> -B <sub>p</sub> <sup>h</sup> -B <sub>e</sub> <sup>a</sup> |

|    |                                                 |        |    |                                               |                                               |   |   |                                                                       |
|----|-------------------------------------------------|--------|----|-----------------------------------------------|-----------------------------------------------|---|---|-----------------------------------------------------------------------|
|    | DFT                                             |        |    | [0.732]                                       | [1.14]                                        |   |   |                                                                       |
| 11 | HCM<br>EHCM(sph)<br>EHCM(asph)<br>Mondal<br>DFT | (3,+1) | 12 | 0.727<br>0.723<br>0.754<br>{0.716}<br>[0.728] | 0.98<br>1.32<br>1.88<br>{4.32}<br>[1.19]      | - | - | $B_p^a-B_e^a-B_e^e$                                                   |
| 12 | HCM<br>EHCM(sph)<br>EHCM(asph)<br>Mondal<br>DFT | (3,+1) | 2  | 0.543<br>0.538<br>0.554<br>{0.557}<br>[0.536] | 1.53<br>1.31<br>1.56<br>{1.06}<br>[1.17]      | - | - | $B_e^a-B_e^f-B_e^g$                                                   |
| 13 | HCM<br>EHCM(sph)<br>EHCM(asph)<br>Mondal<br>DFT | (3,+1) | 3  | 0.277<br>0.296<br>0.276<br>{0.239}<br>[0.259] | -2.02<br>-1.74<br>-1.73<br>{-2.10}<br>[-1.88] | - | - | $B_e^a-B_e^d-B_e^f-B_e^i$                                             |
| 14 | HCM<br>EHCM(sph)<br>EHCM(asph)<br>DFT           | (3,+1) | 6  | 0.102<br>0.110<br>0.097<br>[0.088]            | -1.10<br>-1.07<br>-1.14<br>[-1.05]            | - | - | side surface of<br>tetrahedrons<br>formed by $B_{12}$ -<br>icosahedra |
| 15 | HCM<br>EHCM(sph)<br>EHCM(asph)<br>DFT           | (3,+3) | 1  | 0.079<br>0.090<br>0.085<br>[0.116]            | -2.71<br>-2.62<br>-2.97<br>[-2.05]            | - | - | center of $B_{12}$ icosahedron                                        |
| 16 | HCM<br>EHCM(sph)<br>EHCM(asph)<br>DFT           | (3,+3) | 2  | 0.059<br>0.065<br>0.061<br>[0.059]            | -0.97<br>-0.93<br>-0.97<br>[-0.83]            | - | - | $B_{12}$ tetrahedral void                                             |
| 17 | HCM<br>EHCM(sph)<br>EHCM(asph)<br>DFT           | (3,+3) | 1  | 0.028<br>0.032<br>0.031<br>[0.021]            | -0.31<br>-0.34<br>-0.29<br>[-0.26]            | - | - | $B_{12}$ octahedral void                                              |

Table S2: Complete list of critical points of the electron density of  $\alpha$ -boron as obtained from the refinements of theoretical structure factors  $F_{sta}$ .

| cp # | study                                 | rank   | $m$ | $\rho(r_c)$<br>(eÅ <sup>-3</sup> ) | $L(r_c)$<br>(eÅ <sup>-5</sup> ) | $\epsilon$                   | $\lambda_3$<br>(eÅ <sup>-5</sup> ) | location description                                                                                               |
|------|---------------------------------------|--------|-----|------------------------------------|---------------------------------|------------------------------|------------------------------------|--------------------------------------------------------------------------------------------------------------------|
| 1    | -                                     | (3,-3) | 6   | -                                  | -                               | -                            |                                    | B <sub>p</sub> <sup>a</sup>                                                                                        |
| 2    | -                                     | (3,-3) | 6   | -                                  | -                               | -                            |                                    | B <sub>e</sub> <sup>a</sup>                                                                                        |
| 3    | HCM<br>EHCM(sph)<br>EHCM(asph)<br>DFT | (3,-1) | 3   | 1.095<br>1.082<br>1.073<br>1.080   | 9.18<br>9.11<br>8.40<br>9.21    | 0.02<br>0.00<br>0.01<br>0.00 | 1.32<br>1.42<br>2.15<br>1.69       | B <sub>p</sub> <sup>a</sup> -B <sub>p</sub> <sup>b</sup> (exo)                                                     |
| 4    | HCM<br>EHCM(sph)<br>EHCM(asph)<br>DFT | (3,-1) | 6   | 0.827<br>0.805<br>0.815<br>0.823   | 2.31<br>2.09<br>2.40<br>3.01    | 2.70<br>3.15<br>3.64<br>4.03 | 2.15<br>2.04<br>1.91<br>1.33       | B <sub>p</sub> <sup>a</sup> -B <sub>p</sub> <sup>c</sup> (endo)                                                    |
| 5    | HCM<br>EHCM(sph)<br>EHCM(asph)<br>DFT | (3,-1) | 6   | 0.798<br>0.783<br>0.792<br>0.796   | 2.06<br>2.11<br>2.46<br>2.87    | 1.87<br>2.69<br>2.92<br>2.70 | 2.47<br>2.08<br>1.81<br>1.57       | B <sub>e</sub> <sup>a</sup> -B <sub>e</sub> <sup>d</sup> (endo)                                                    |
| 6    | HCM<br>EHCM(sph)<br>EHCM(asph)<br>DFT | (3,-1) | 6   | 0.760<br>0.749<br>0.759<br>0.768   | 1.60<br>1.63<br>2.00<br>2.60    | 2.53<br>3.38<br>4.17<br>3.45 | 2.35<br>2.06<br>1.78<br>1.45       | B <sub>p</sub> <sup>a</sup> -B <sub>e</sub> <sup>e</sup> (endo)                                                    |
| 7    | HCM<br>EHCM(sph)<br>EHCM(asph)<br>DFT | (3,-1) | 12  | 0.750<br>0.749<br>0.758<br>0.764   | 1.16<br>1.57<br>1.93<br>2.39    | 3.34<br>3.83<br>4.22<br>3.93 | 2.56<br>2.15<br>1.72<br>1.50       | B <sub>p</sub> <sup>a</sup> -B <sub>e</sub> <sup>a</sup> (endo)                                                    |
| 8    | HCM<br>EHCM(sph)<br>EHCM(asph)<br>DFT | (3,-1) | 6   | 0.529<br>0.538<br>0.537<br>0.541   | 0.73<br>1.09<br>1.22<br>1.43    | 2.09<br>2.79<br>3.53<br>3.58 | 2.12<br>1.61<br>1.20<br>1.18       | B <sub>e</sub> <sup>a</sup> -B <sub>e</sub> <sup>f</sup> (exo)                                                     |
| 9    | HCM<br>EHCM(sph)<br>EHCM(asph)<br>DFT | (3,+1) | 2   | 0.801<br>0.783<br>0.798<br>0.807   | 1.15<br>1.22<br>1.60<br>2.15    | -                            | -                                  | B <sub>p</sub> <sup>a</sup> -B <sub>p</sub> <sup>c</sup> -B <sub>p</sub> <sup>h</sup>                              |
| 10   | HCM<br>EHCM(sph)<br>EHCM(asph)<br>DFT | (3,+1) | 6   | 0.711<br>0.712<br>0.728<br>0.732   | 0.03<br>0.37<br>0.88<br>1.14    | -                            | -                                  | B <sub>p</sub> <sup>a</sup> -B <sub>p</sub> <sup>h</sup> -B <sub>e</sub> <sup>a</sup>                              |
| 11   | HCM<br>EHCM(sph)<br>EHCM(asph)<br>DFT | (3,+1) | 12  | 0.712<br>0.712<br>0.725<br>0.728   | 0.16<br>0.56<br>0.99<br>1.19    | -                            | -                                  | B <sub>p</sub> <sup>a</sup> -B <sub>e</sub> <sup>a</sup> -B <sub>e</sub> <sup>e</sup>                              |
| 12   | HCM<br>EHCM(sph)<br>EHCM(asph)<br>DFT | (3,+1) | 2   | 0.520<br>0.533<br>0.533<br>0.536   | 0.50<br>0.89<br>1.05<br>1.17    | -                            | -                                  | B <sub>e</sub> <sup>a</sup> -B <sub>e</sub> <sup>f</sup> -B <sub>e</sub> <sup>g</sup>                              |
| 13   | HCM                                   | (3,+1) | 3   | 0.253                              | -2.02                           | -                            | -                                  | B <sub>e</sub> <sup>a</sup> -B <sub>e</sub> <sup>d</sup> -B <sub>e</sub> <sup>f</sup> -B <sub>e</sub> <sup>i</sup> |

|    |                                       |        |   |                                  |                                  |   |   |                                                                          |
|----|---------------------------------------|--------|---|----------------------------------|----------------------------------|---|---|--------------------------------------------------------------------------|
|    | EHCM(sph)                             |        |   | 0.262                            | -1.91                            |   |   |                                                                          |
|    | EHCM(asph)                            |        |   | 0.258                            | -1.91                            |   |   |                                                                          |
|    | DFT                                   |        |   | 0.259                            | -1.88                            |   |   |                                                                          |
| 14 | HCM<br>EHCM(sph)<br>EHCM(asph)<br>DFT | (3,+1) | 6 | 0.076<br>0.086<br>0.088<br>0.088 | -1.13<br>-1.13<br>-1.09<br>-1.05 | - | - | side surface of<br>tetrahedrons<br>formed by B <sub>12</sub> -icosahedra |
| 15 | HCM<br>EHCM(sph)<br>EHCM(asph)<br>DFT | (3,+3) | 1 | 0.065<br>0.086<br>0.095<br>0.116 | -2.62<br>-2.47<br>-2.63<br>-2.05 | - | - | center of B <sub>12</sub> icosahedron                                    |
| 16 | HCM<br>EHCM(sph)<br>EHCM(asph)<br>DFT | (3,+3) | 2 | 0.041<br>0.054<br>0.055<br>0.059 | -0.92<br>-0.90<br>-0.90<br>-0.83 | - | - | B <sub>12</sub> tetrahedral void                                         |
| 17 | HCM<br>EHCM(sph)<br>EHCM(asph)<br>DFT | (3,+3) | 1 | 0.019<br>0.022<br>0.021<br>0.021 | -0.22<br>-0.27<br>-0.27<br>-0.26 | - | - | B <sub>12</sub> octahedral void                                          |

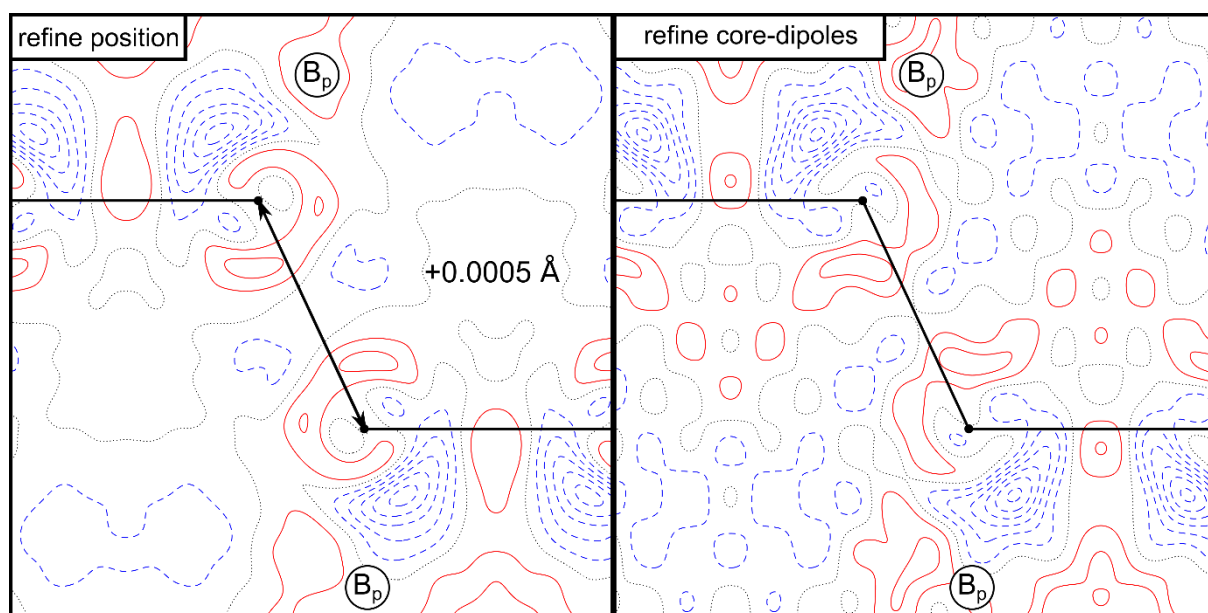

Figure S1: Comparison of residual density maps from refinements of the atomic position (left) and core dipole functions (right) against theoretical structure factors  $F_{\text{sta}}$ . Positive (solid red) and negative (dashed blue) contour values are shown in  $0.01 \text{ e\AA}^{-3}$  steps and the zero contour lines are drawn as dotted black lines. Refining the positions leads to a bond elongation of  $0.0005 \text{ \AA}$  as indicated by the double-headed arrow.

Table S3: Parameters of the individual multipolar models for refinements against experimental ( $F_{\text{exp}}$ ) and theoretical ( $F_{\text{sta}}$ ) structure factors. \* the „valence v2“ and „core“ atom share the same parameters  $P_c$  and  $\kappa_c$ . † value not refined and taken from refinements against  $F_{\text{sta}}$ .

| $F_{\text{exp}}$                      | HCM           | EHCM(sph)      | EHCM(asph)     |
|---------------------------------------|---------------|----------------|----------------|
| <b>scale</b>                          | 2.392 (4)     | 2.423 (6)      | 2.430 (4)      |
| <b><math>\rho_{\text{iso}}</math></b> | 1.25 (2)      | 1.9 (3)        | 2.3 (2)        |
| <b>B<sub>p</sub> (valence v1)</b>     |               |                |                |
| <b>occ</b>                            | 1.0           | 1.0            | 1.0            |
| <b>x</b>                              | 0.237800 (15) | 0.237799 (15)  | 0.237825 (14)  |
| <b>y</b>                              | 0.118900      | 0.118900       | 0.118912       |
| <b>z</b>                              | 0.108678 (5)  | 0.108679 (5)   | 0.108701 (4)   |
| <b>U<sub>11</sub></b>                 | 0.00273 (2)   | 0.00264 (3)    | 0.00264 (3)    |
| <b>U<sub>22</sub></b>                 | 0.00310 (2)   | 0.00302 (3)    | 0.00302 (3)    |
| <b>U<sub>33</sub></b>                 | 0.00263 (2)   | 0.00254 (3)    | 0.00255 (3)    |
| <b>U<sub>12</sub></b>                 | 0.001362      | 0.001321       | 0.001320       |
| <b>U<sub>13</sub></b>                 | -0.00027 (1)  | -0.000265 (10) | -0.000262 (10) |
| <b>U<sub>23</sub></b>                 | -0.000133     | -0.000133      | -0.000131      |
| <b>U<sub>eq</sub></b>                 | 0.002860 (14) | 0.002777 (18)  | 0.002781 (18)  |
| <b>P<sub>v</sub></b>                  | 2.92 (4)      | 1.4 (3)        | 1.1 (2)        |
| <b><math>\kappa_v</math></b>          | 0.935 (10)    | 0.954 (19)     | 0.95 (3)       |
| <b><math>\kappa_v'</math></b>         | 0.91 (3)      | 0.94 (4)       | 0.98 (3)       |
| <b>P<sub>00</sub></b>                 | 0.000000      | 1.5 (3)        | 1.4 (2)        |
| <b>P<sub>11+</sub></b>                | 0.018 (16)    | 0.020 (15)     | -0.058 (16)    |
| <b>P<sub>11-</sub></b>                | 0.078 (16)    | 0.076 (15)     | 0.144 (19)     |
| <b>P<sub>20</sub></b>                 | -0.095 (13)   | -0.089 (12)    | -0.078 (10)    |
| <b>P<sub>22+</sub></b>                | -0.027 (14)   | -0.037 (13)    | -0.024 (11)    |
| <b>P<sub>22-</sub></b>                | -0.136 (12)   | -0.127 (13)    | -0.093 (9)     |
| <b>P<sub>31+</sub></b>                | 0.046 (13)    | 0.053 (12)     | 0.059 (11)     |
| <b>P<sub>31-</sub></b>                | -0.141 (16)   | -0.133 (17)    | -0.119 (13)    |
| <b>P<sub>33+</sub></b>                | 0.20 (2)      | 0.20 (3)       | 0.201 (17)     |
| <b>P<sub>33-</sub></b>                | 0.001 (12)    | 0.017 (10)     | 0.024 (9)      |
| <b>P<sub>40</sub></b>                 | 0.043 (15)    | 0.009 (14)     | 0.009 (12)     |
| <b>P<sub>42+</sub></b>                | 0.009 (17)    | 0.009 (17)     | 0.003 (14)     |
| <b>P<sub>42-</sub></b>                | -0.02 (3)     | -0.00 (3)      | 0.005 (16)     |
| <b>P<sub>44+</sub></b>                | 0.031 (18)    | 0.023 (17)     | 0.014 (14)     |
| <b>P<sub>44-</sub></b>                | 0.001 (13)    | -0.007 (12)    | -0.012 (10)    |
| <b>B<sub>p</sub> (core)</b>           |               |                |                |
| <b>occ</b>                            | 1.0           | 1.0            | 1.0            |
| <b>P<sub>c</sub></b>                  | 2.000000      | 2.005752†      | 2.001875†      |
| <b><math>\kappa_c</math></b>          | 1.000000      | 0.996701†      | 0.999194†      |
| <b><math>\kappa_c'</math></b>         | –             | –              | 1.126216†      |
| <b>P<sub>11+</sub></b>                | –             | –              | 0.001021†      |
| <b>P<sub>11-</sub></b>                | –             | –              | -0.003796†     |

| $F_{\text{exp}}$                  | HCM           | EHCM(sph)     | EHCM(asph)    |
|-----------------------------------|---------------|---------------|---------------|
| <b>B<sub>e</sub> (valence v1)</b> |               |               |               |
| <b>occ</b>                        | 1.0           | 1.0           | 1.0           |
| <b>x</b>                          | 0.196873      | 0.196879      | 0.196837      |
| <b>y</b>                          | 0.393746 (16) | 0.393758 (15) | 0.393673 (14) |
| <b>z</b>                          | 0.024302 (5)  | 0.024302 (5)  | 0.024299 (5)  |
| <b>U<sub>11</sub></b>             | 0.003159 (19) | 0.00301 (3)   | 0.00305 (2)   |
| <b>U<sub>22</sub></b>             | 0.00287 (2)   | 0.00272 (3)   | 0.00277 (3)   |
| <b>U<sub>33</sub></b>             | 0.00316 (2)   | 0.00300 (3)   | 0.00304 (3)   |
| <b>U<sub>12</sub></b>             | 0.001435      | 0.001361      | 0.001384      |
| <b>U<sub>13</sub></b>             | -0.000020 (5) | -0.000019 (5) | -0.000018 (5) |
| <b>U<sub>23</sub></b>             | -0.000040     | -0.000039     | -0.000036     |
| <b>U<sub>eq</sub></b>             | 0.003095 (14) | 0.002944 (18) | 0.002986 (15) |
| <b>P<sub>v</sub></b>              | 3.08 (4)      | 0.9 (5)       | 0.9 (4)       |
| <b>κ<sub>v</sub></b>              | 0.926 (9)     | 0.92 (4)      | 1.09 (4)      |
| <b>κ<sub>v</sub>'</b>             | 0.85 (3)      | 0.94 (3)      | 0.81 (3)      |
| <b>P<sub>00</sub></b>             | 0.000000      | 2.2 (3)       | 2.56 (17)     |
| <b>P<sub>11+</sub></b>            | -0.18 (3)     | -0.125 (16)   | -0.34 (4)     |
| <b>P<sub>11-</sub></b>            | -0.035 (14)   | -0.018 (11)   | -0.059 (17)   |
| <b>P<sub>20</sub></b>             | 0.034 (13)    | 0.013 (10)    | -0.132 (18)   |
| <b>P<sub>22+</sub></b>            | -0.022 (13)   | -0.032 (11)   | 0.21 (2)      |
| <b>P<sub>22-</sub></b>            | -0.032 (12)   | -0.023 (9)    | -0.13 (3)     |
| <b>P<sub>31+</sub></b>            | -0.135 (19)   | -0.107 (15)   | -0.075 (19)   |
| <b>P<sub>31-</sub></b>            | -0.053 (15)   | -0.041 (12)   | -0.09 (2)     |
| <b>P<sub>33+</sub></b>            | 0.20 (3)      | 0.174 (16)    | 0.22 (3)      |
| <b>P<sub>33-</sub></b>            | 0.094 (15)    | 0.075 (11)    | 0.22 (3)      |
| <b>P<sub>40</sub></b>             | -0.02 (3)     | -0.025 (17)   | -0.06 (3)     |
| <b>P<sub>42+</sub></b>            | 0.02 (3)      | 0.022 (17)    | 0.07 (3)      |
| <b>P<sub>42-</sub></b>            | 0.02 (3)      | 0.02 (3)      | 0.06 (3)      |
| <b>P<sub>44+</sub></b>            | 0.07 (3)      | 0.037 (16)    | -0.01 (3)     |
| <b>P<sub>44-</sub></b>            | -0.050 (17)   | -0.044 (12)   | -0.080 (19)   |
| <b>B<sub>e</sub> (core)</b>       |               |               |               |
| <b>occ</b>                        | 1.0           | 1.0           | 0.5*          |
| <b>P<sub>c</sub></b>              | 2.000000      | 2.007725†     | 2.011135†     |
| <b>κ<sub>c</sub></b>              | 1.000000      | 0.998263†     | 0.996957†     |
| <b>κ<sub>c</sub>'</b>             | –             | –             | 0.992718†     |
| <b>P<sub>11+</sub></b>            | –             | –             | 0.007922†     |
| <b>P<sub>11-</sub></b>            | –             | –             | 0.001127†     |
| <b>B<sub>e</sub> (valence v2)</b> |               |               |               |
| <b>occ</b>                        | –             | –             | 0.5*          |
| <b>κ<sub>v2</sub>'</b>            | –             | –             | 0.348354†     |
| <b>P<sub>11+</sub></b>            | –             | –             | 0.111062†     |
| <b>P<sub>11-</sub></b>            | –             | –             | 0.042466†     |
| <b>P<sub>20</sub></b>             | –             | –             | 0.143420†     |
| <b>P<sub>22+</sub></b>            | –             | –             | -0.247276†    |
| <b>P<sub>22-</sub></b>            | –             | –             | 0.057953†     |
| <b>P<sub>31+</sub></b>            | –             | –             | -0.097147†    |
| <b>P<sub>31-</sub></b>            | –             | –             | 0.013475†     |
| <b>P<sub>33+</sub></b>            | –             | –             | 0.057291†     |
| <b>P<sub>33-</sub></b>            | –             | –             | -0.029583†    |



| $F_{sta}$                   | HCM       | EHCM(sph) | EHCM(asph) |
|-----------------------------|-----------|-----------|------------|
| <i>scale</i>                | 98.80968  | 100.00000 | 100.00000  |
| B <sub>p</sub> (valence v1) |           |           |            |
| <i>occ</i>                  | 1.0       | 1.0       | 1.0        |
| $P_v$                       | 2.970676  | 1.906949  | 1.798231   |
| $U_{iso}$                   | 0.000000  | 0.000000  | 0.000000   |
| $\kappa_v$                  | 0.987113  | 1.024930  | 1.008928   |
| $\kappa'_v$                 | 0.867116  | 0.902841  | 0.999876   |
| $P_{00}$                    | 0.000000  | 1.022481  | 0.879467   |
| $P_{11+}$                   | -0.014751 | 0.004075  | -0.037922  |
| $P_{11-}$                   | 0.033440  | 0.054917  | 0.129619   |
| $P_{20}$                    | -0.107229 | -0.097928 | -0.070309  |
| $P_{22+}$                   | -0.021802 | -0.025685 | -0.015897  |
| $P_{22-}$                   | -0.145884 | -0.139408 | -0.080796  |
| $P_{31+}$                   | 0.075809  | 0.084118  | 0.050749   |
| $P_{31-}$                   | -0.157719 | -0.146018 | -0.107901  |
| $P_{33+}$                   | 0.226153  | 0.206517  | 0.175569   |
| $P_{33-}$                   | 0.047387  | 0.034883  | 0.013719   |
| $P_{40}$                    | 0.004292  | 0.006547  | 0.008700   |
| $P_{42+}$                   | 0.029197  | 0.002021  | 0.000324   |
| $P_{42-}$                   | 0.030556  | 0.014826  | 0.005373   |
| $P_{44+}$                   | 0.012848  | -0.000608 | 0.01757    |
| $P_{44-}$                   | 0.032987  | 0.031303  | 0.006025   |
| B <sub>p</sub> (core)       |           |           |            |
| <i>occ</i>                  | 1.0       | 1.0       | 1.0        |
| $P_c$                       | 2.000000  | 2.005752  | 2.001875   |
| $\kappa_c$                  | 1.000000  | 0.996701  | 0.999194   |
| $\kappa'_c$                 | -         | -         | 1.126216   |
| $P_{11+}$                   | -         | -         | 0.001021   |
| $P_{11-}$                   | -         | -         | -0.003796  |

| $F_{sta}$                   | HCM       | EHCM(sph) | EHCM(asph) |
|-----------------------------|-----------|-----------|------------|
| B <sub>e</sub> (valence v1) |           |           |            |
| $OCC$                       | 1.0       | 1.0       | 1.0        |
| $P_v$                       | 3.029322  | 1.629217  | 1.589855   |
| $U_{iso}$                   | 0.000000  | 0.000000  | 0.000000   |
| $K_v$                       | 0.994612  | 1.019481  | 1.054493   |
| $K_v'$                      | 0.912220  | 0.936793  | 0.821156   |
| $P_{00}$                    | 0.000000  | 1.427873  | 1.719434   |
| $P_{11+}$                   | -0.126289 | -0.121895 | -0.288148  |
| $P_{11-}$                   | -0.010054 | -0.028842 | -0.062408  |
| $P_{20}$                    | 0.011378  | 0.005510  | -0.121370  |
| $P_{22+}$                   | 0.003626  | -0.014999 | 0.185338   |
| $P_{22-}$                   | -0.021418 | -0.016922 | -0.105249  |
| $P_{31+}$                   | -0.12756  | -0.121687 | -0.055604  |
| $P_{31-}$                   | -0.019615 | -0.018638 | -0.068528  |
| $P_{33+}$                   | 0.171735  | 0.179353  | 0.194364   |
| $P_{33-}$                   | 0.070011  | 0.079635  | 0.180315   |
| $P_{40}$                    | 0.023885  | -0.008621 | -0.047154  |
| $P_{42+}$                   | 0.05538   | 0.028484  | 0.058562   |
| $P_{42-}$                   | 0.016002  | 0.003843  | 0.041137   |
| $P_{44+}$                   | 0.023583  | 0.019310  | -0.004083  |
| $P_{44-}$                   | -0.013882 | -0.014066 | -0.057457  |
| B <sub>e</sub> (core)       |           |           |            |
| $OCC$                       | 1.0       | 1.0       | 0.5*       |
| $P_c$                       | 2.000000  | 2.007725  | 2.011135   |
| $K_c$                       | 1.000000  | 0.998263  | 0.996957   |
| $K_c'$                      | —         | —         | 0.992718   |
| $P_{11+}$                   | —         | —         | 0.007922   |
| $P_{11-}$                   | —         | —         | 0.001127   |
| B <sub>e</sub> (valence v2) |           |           |            |
| $OCC$                       | —         | —         | 0.5*       |
| $K_{v2}'$                   | —         | —         | 0.348354   |
| $P_{11+}$                   | —         | —         | 0.111062   |
| $P_{11-}$                   | —         | —         | 0.042466   |
| $P_{20}$                    | —         | —         | 0.143420   |
| $P_{22+}$                   | —         | —         | -0.247276  |
| $P_{22-}$                   | —         | —         | 0.057953   |
| $P_{31+}$                   | —         | —         | -0.097147  |
| $P_{31-}$                   | —         | —         | 0.013475   |
| $P_{33+}$                   | —         | —         | 0.057291   |
| $P_{33-}$                   | —         | —         | -0.029583  |

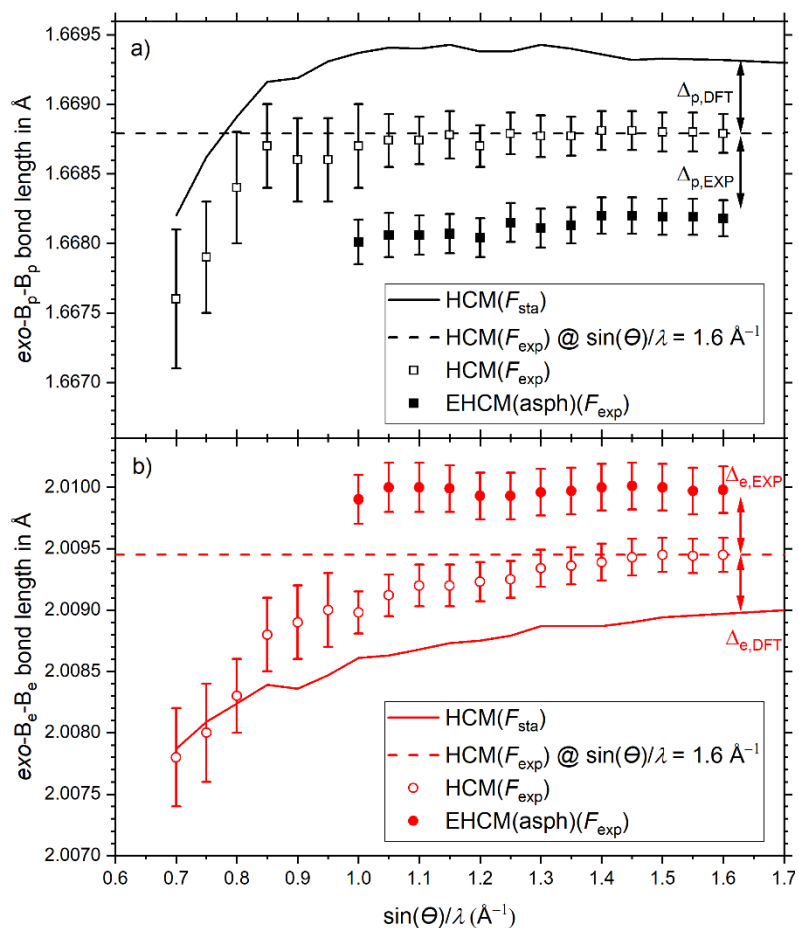

**Figure S2.** Absolute resolution dependent bond length values of the a) *exo*-B<sub>p</sub>-B<sub>p</sub>-bond and b) *exo*-B<sub>e</sub>-B<sub>e</sub>-bond. Solid lines are based on refinements of an HCM against  $F_{\text{sta}}$  and are taken from Figure 5b. Values of the HCM are shown with open symbols, values of the EHCM(asph) are shown with closed symbols. The dash horizontal lines show the values used for the DFT calculation.

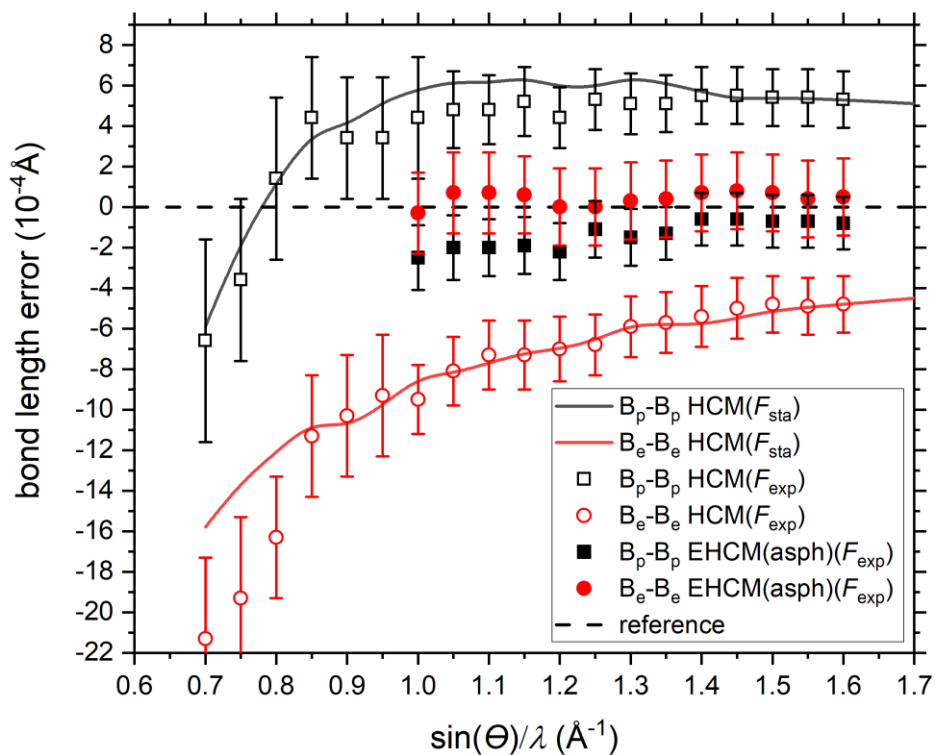

**Figure S3.** Relative bond length errors for the *exo*-bonds between B<sub>p</sub> (black) and B<sub>e</sub> (red) atoms. Solid lines are taken from Figure 5b of the manuscript and have been set equal to the HCM( $F_{\text{exp}}$ ) refinements by translation at the maximum experimental resolution. The dashed horizontal line signals the absence of core asphericity shifts based on the values of  $\Delta_{\text{asph,DFT}}$ .

## File S1: Further details of core asphericity shifts

Figure S6 contains also contains the bond length values from HCM( $F_{sta}$ ) refinements as solid lines. Note that the DFT calculations (solid lines) are based on the structural model from the experimental HCM refinements (open symbols), which ignored core asphericity. As a consequence, the structural model employed for the DFT calculations is biased by asphericity shifts and is not representing an equilibrium geometry. Therefore, the structure factors  $F_{sta}$  derived from these DFT calculations are already biased by asphericity shifts induced by dipolar core polarizations of the experimental data. These polarization effects can be compensated by refinements of an HCM against these theoretical  $F_{sta}$  when the coordinates of the two independent boron atoms  $B_p$  and  $B_e$  are allowed to relax. In that case, the polarization effects are compensated by asphericity shifts of the  $B_p$  and  $B_e$  positions with regard to the constrained positions in the DFT model. Note that these shifts are of the same extent as the asphericity shifts between the experimental EHCM and HCM. They shift in opposite direction, because dipolar core polarization is now taken into account when the HCM is replaced by an EHCM. This shift appears to be rather independent of the resolution, except for the  $B_e$ - $B_e$  bond length below  $\sin(\theta)/\lambda \leq 0.9 \text{ \AA}^{-1}$ .

Using  $\Delta_{asph,EXP} = \Delta_{asph,DFT}$  as a rule, the resulting bond length errors can be plotted on a relative scale by translating all datapoints of each  $B_p$ - $B_p$  and  $B_e$ - $B_e$  bond so that experimental and theoretical HCM values match at  $\sin(\theta)/\lambda = 1.6 \text{ \AA}^{-1}$ , see Figure S6. The experimental and theoretical HCM data match within 1 s.u. for the  $B_p$ - $B_p$  error in the whole resolution range  $0.7 \text{ \AA}^{-1} \leq \sin(\theta)/\lambda \leq 1.6 \text{ \AA}^{-1}$  and down to  $\sin(\theta)/\lambda \geq 0.85 \text{ \AA}^{-1}$  for the  $B_e$ - $B_e$  error value, which highlights the excellent quality of the experimental dataset. This confirms that *core asphericity shifts* can be effectively taken into account using an EHCM in case of  $\alpha$ -boron. We also demonstrate that the bond length error in the HCM model is significantly reduced in the EHCM to values below  $0.0001 \text{ \AA}$ . Note that due to the small bond length changes, a DFT calculation based on the EHCM(asph) structural model would produce only minute changes of the valence electron density distribution, which is the origin of dipolar core polarization in the core region of the atoms according to the Hellman-Feynman condition. Therefore, HCM refinements based on static structure factors  $F_{sta}$  originating from the EHCM(asph) structural model would yield almost identical values for the *core asphericity shifts*. This renders an iterative approach as used in Hirshfeld atoms refinements (see Introduction of the manuscript) unnecessary.

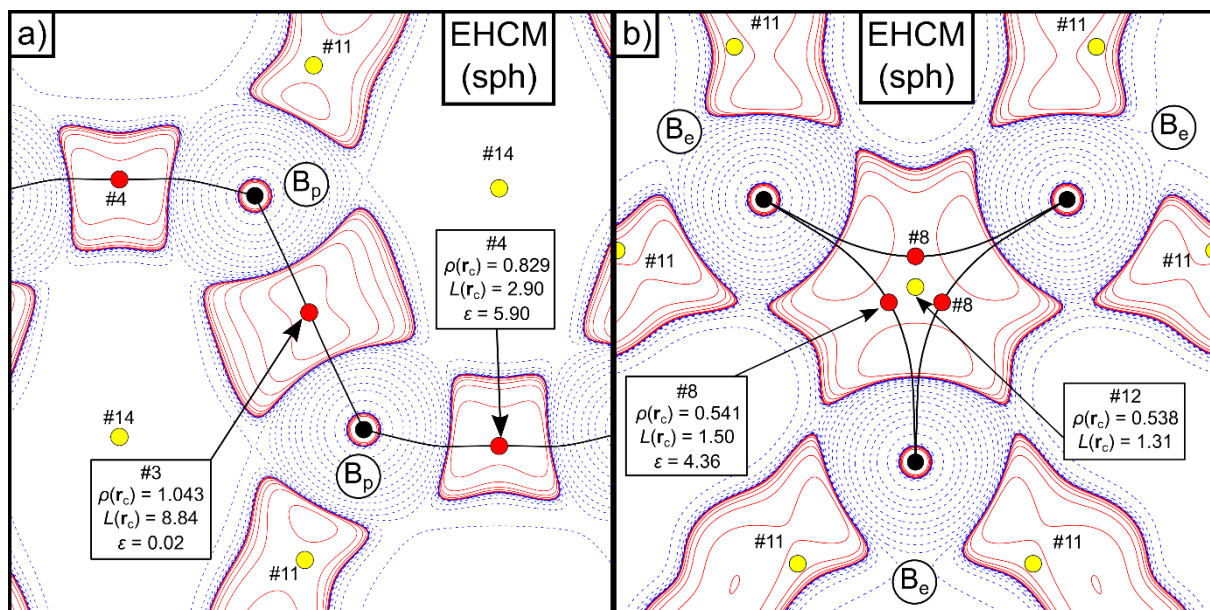

Figure S4:  $L(r) = -\nabla^2\rho(r)$  maps of the intericosahedral (a) (2c,2e)-B<sub>p</sub>-B<sub>p</sub> bond and (b) (3c,2e)-Be-Be-Be bond in  $\alpha$ -boron from the experimental EHCM(sph) refinement. Positive (solid red) and negative (dashed blue) contour lines are shown at  $\pm 2 \cdot 10^n$ ,  $\pm 4 \cdot 10^n$ ,  $\pm 8 \cdot 10^n$  eÅ<sup>-3</sup>,  $n = \pm 3, \pm 2, \pm 1, 0$ .  $\rho(r_c)$ - and  $L(r_c)$ -values are given in eÅ<sup>-3</sup> and eÅ<sup>-5</sup>, respectively. The numbers (e.g. #4, #8, #12, etc.) next to the critical points correspond to the numbering scheme of the CPs in Table S1.

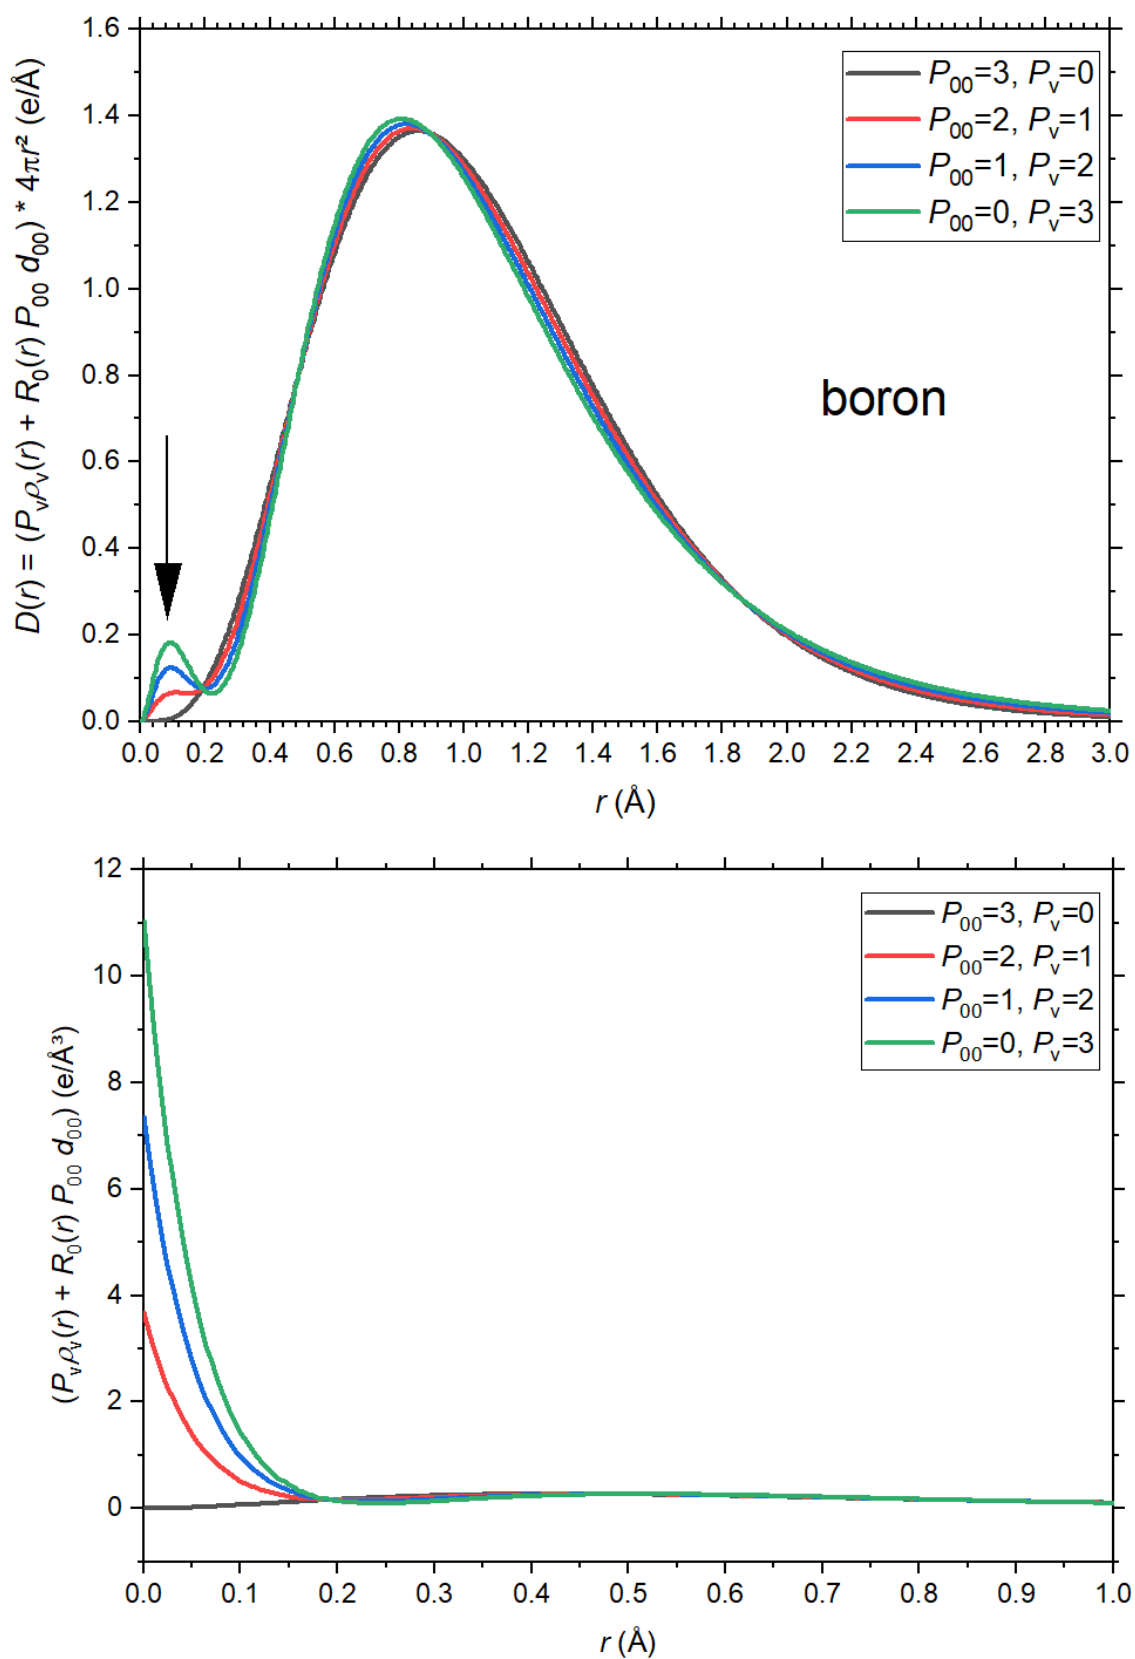

Figure S5: Effect of the combined refinement of  $P_v/P_{00}$  parameters of an (E)HCM on the valence electron density in the core region of a neutral, isolated boron atom in its ground state from the Volkov-Macchi database (VM). The scaling effect on the contribution to the core region is highlighted by an arrow. Further parameters of the model are  $\zeta = 2.464 \text{ au}^{-1}$ ,  $\kappa_v = 1.0$ ,  $\kappa'_v = 1.0$  and  $n_0 = 2$ .
